# Supplementary material for: Deubiquitinase inhibitor PR-619 reduces Smad4 expression and suppresses renal fibrosis in mice with unilateral ureteral obstruction
Source: PubMed Central journal article supplement (PMC6095583; doi:10.1371/journal.pone.0202409), 2018-08-16
Supplement: pone.0202409.s003.pdf [file pone.0202409.s003.pdf]

**Figure2B**

|              |   | $\alpha$ -SMA | GAPDH     | $\alpha$ -SMA/GAPDH | mean        | SD          |
|--------------|---|---------------|-----------|---------------------|-------------|-------------|
| sham         | 1 | 52.485        | 21888.719 | 0.00239781          | 0.051663745 | 0.032074661 |
|              | 2 | 1409.698      | 20441.134 | 0.068963786         |             |             |
|              | 3 | 829.698       | 22483.962 | 0.03690177          |             |             |
|              | 4 | 1846.406      | 22706.962 | 0.081314533         |             |             |
|              | 5 | 1332.991      | 19391.548 | 0.068740825         |             |             |
| UUO          | 1 | 17451.134     | 18753.376 | 0.930559596         | 0.931763906 | 0.077771605 |
|              | 2 | 17369.719     | 18636.255 | 0.932039136         |             |             |
|              | 3 | 20185.841     | 19151.548 | 1.054005713         |             |             |
|              | 4 | 17294.841     | 20580.255 | 0.84036087          |             |             |
|              | 5 | 17074.134     | 18932.255 | 0.901854217         |             |             |
| UUO + PR-619 | 1 | 7505.477      | 20533.376 | 0.365525718         | 0.4973585   | 0.188843128 |
|              | 2 | 15161.305     | 19392.376 | 0.781817813         |             |             |
|              | 3 | 10366.891     | 18206.426 | 0.569408351         |             |             |
|              | 4 | 9494.598      | 20268.376 | 0.468443944         |             |             |
|              | 5 | 5157.77       | 17101.548 | 0.301596674         |             |             |

**Figure3B**

|              |   | fibronectin | GAPDH     | fibronectin/GAPDH | mean        | SD          |
|--------------|---|-------------|-----------|-------------------|-------------|-------------|
| sham         | 1 | 2872.74     | 21986.548 | 0.130658983       | 0.169351609 | 0.031729032 |
|              | 2 | 3212.225    | 17698.255 | 0.181499532       |             |             |
|              | 3 | 3402.17512  | 17250.841 | 0.197217928       |             |             |
|              | 4 | 3472.487672 | 17625.255 | 0.197017727       |             |             |
|              | 5 | 2128.472434 | 15163.962 | 0.140363873       |             |             |
| UUO          | 1 | 11777.761   | 13925.962 | 0.845741285       | 0.848684652 | 0.212689142 |
|              | 2 | 13608.468   | 13671.426 | 0.995394921       |             |             |
|              | 3 | 15572.054   | 13947.134 | 1.116505656       |             |             |
|              | 4 | 11739.75736 | 17225.962 | 0.681515341       |             |             |
|              | 5 | 9773.052382 | 16173.426 | 0.604266059       |             |             |
| UUO + PR-619 | 1 | 7060.933    | 16506.548 | 0.427765575       | 0.541823032 | 0.115939398 |
|              | 2 | 7290.054    | 13144.841 | 0.554594308       |             |             |
|              | 3 | 9970.104    | 13667.548 | 0.729472763       |             |             |
|              | 4 | 7559.473767 | 14333.548 | 0.527397248       |             |             |
|              | 5 | 6889.795593 | 14662.719 | 0.469885264       |             |             |

**Figure 4A**

|              |   | MMP2      | GAPDH     | MMP2/GAPDH  | mean        | SD          |
|--------------|---|-----------|-----------|-------------|-------------|-------------|
| sham         | 1 | 7468.598  | 22739.678 | 0.328439039 | 0.382219896 | 0.049437647 |
|              | 2 | 7219.841  | 16034.841 | 0.450259594 |             |             |
|              | 3 | 6015.255  | 16588.376 | 0.362618679 |             |             |
|              | 4 | 6365.962  | 17961.255 | 0.354427461 |             |             |
|              | 5 | 6413.426  | 15440.841 | 0.415354708 |             |             |
| UUO          | 1 | 17888.619 | 15406.426 | 1.161114135 | 1.078358002 | 0.13826453  |
|              | 2 | 19939.134 | 15579.134 | 1.279861512 |             |             |
|              | 3 | 15574.255 | 15299.255 | 1.017974731 |             |             |
|              | 4 | 15363.376 | 16104.548 | 0.953977473 |             |             |
|              | 5 | 14488.962 | 14801.841 | 0.978862156 |             |             |
| UUO + PR-619 | 1 | 10172.669 | 12372.841 | 0.822177299 | 0.600671539 | 0.198310347 |
|              | 2 | 10362.083 | 15012.134 | 0.690247169 |             |             |
|              | 3 | 10514.426 | 17039.426 | 0.617064565 |             |             |
|              | 4 | 4942.255  | 17357.548 | 0.284732325 |             |             |
|              | 5 | 11549.305 | 19603.79  | 0.589136335 |             |             |

|              |   | MMP9      | GAPDH     | MMP9/GAPDH  | mean        | SD          |
|--------------|---|-----------|-----------|-------------|-------------|-------------|
| sham         | 1 | 7712.134  | 22739.678 | 0.339148778 | 0.208987772 | 0.144286562 |
|              | 2 | 6187.841  | 16034.841 | 0.385899742 |             |             |
|              | 3 | 2552.77   | 16588.376 | 0.153889085 |             |             |
|              | 4 | 1692.941  | 17961.255 | 0.094255162 |             |             |
|              | 5 | 1107.82   | 15440.841 | 0.071746092 |             |             |
| UUO          | 1 | 16913.012 | 15406.426 | 1.097789455 | 0.972659998 | 0.26066007  |
|              | 2 | 16392.184 | 15579.134 | 1.052188395 |             |             |
|              | 3 | 19903.548 | 15299.255 | 1.300948837 |             |             |
|              | 4 | 11392.184 | 16104.548 | 0.707389242 |             |             |
|              | 5 | 10435.062 | 14801.841 | 0.704984062 |             |             |
| UUO + PR-619 | 1 | 8907.891  | 12372.841 | 0.719955182 | 0.588116953 | 0.238424344 |
|              | 2 | 12190.891 | 15012.134 | 0.812069157 |             |             |
|              | 3 | 12716.184 | 17039.426 | 0.746280068 |             |             |
|              | 4 | 6392.477  | 17357.548 | 0.36828226  |             |             |
|              | 5 | 5763.477  | 19603.79  | 0.293998099 |             |             |

**Figure 5**

|              |   | Smad2     | GAPDH     | Smad2/GAPDH | mean        | SD          |
|--------------|---|-----------|-----------|-------------|-------------|-------------|
| sham         | 1 | 12295.962 | 17422.255 | 0.705761797 | 0.465747782 | 0.23084214  |
|              | 2 | 13340.669 | 18263.962 | 0.730436748 |             |             |
|              | 3 | 6037.719  | 20050.083 | 0.301131871 |             |             |
|              | 4 | 4993.548  | 15984.548 | 0.312398449 |             |             |
|              | 5 | 5612.719  | 20116.548 | 0.279010047 |             |             |
| UUO          | 1 | 21951.083 | 22785.205 | 0.963391947 | 1.017086914 | 0.256867202 |
|              | 2 | 18313.548 | 18199.841 | 1.006247692 |             |             |
|              | 3 | 14374.548 | 17987.669 | 0.799133451 |             |             |
|              | 4 | 18616.376 | 12813.426 | 1.45288044  |             |             |
|              | 5 | 15024.426 | 17393.79  | 0.863781039 |             |             |
| UUO + PR-619 | 1 | 20522.083 | 19082.548 | 1.075437253 | 1.019893388 | 0.243005484 |
|              | 2 | 14977.669 | 16911.134 | 0.88566911  |             |             |
|              | 3 | 15494.426 | 11796.012 | 1.313530878 |             |             |
|              | 4 | 8411.134  | 12325.134 | 0.68243753  |             |             |
|              | 5 | 18262.376 | 15986.083 | 1.142392167 |             |             |

|              |   | Smad3     | GAPDH     | Smad3/GAPDH | mean        | SD          |
|--------------|---|-----------|-----------|-------------|-------------|-------------|
| sham         | 1 | 3067.305  | 17422.255 | 0.176056716 | 0.120018862 | 0.068057973 |
|              | 2 | 3707.841  | 18263.962 | 0.203014056 |             |             |
|              | 3 | 1136.113  | 20050.083 | 0.056663755 |             |             |
|              | 4 | 1768.77   | 15984.548 | 0.11065499  |             |             |
|              | 5 | 1080.355  | 20116.548 | 0.053704791 |             |             |
| UUO          | 1 | 19516.79  | 22785.205 | 0.85655383  | 0.90516637  | 0.226608573 |
|              | 2 | 15495.548 | 18199.841 | 0.851411174 |             |             |
|              | 3 | 13896.134 | 17987.669 | 0.772536675 |             |             |
|              | 4 | 16670.376 | 12813.426 | 1.301008489 |             |             |
|              | 5 | 12946.548 | 17393.79  | 0.744320128 |             |             |
| UUO + PR-619 | 1 | 18932.79  | 19082.548 | 0.992152096 | 0.660841897 | 0.265176181 |
|              | 2 | 11336.548 | 16911.134 | 0.670360013 |             |             |
|              | 3 | 9545.962  | 11796.012 | 0.809253331 |             |             |
|              | 4 | 3627.719  | 12325.134 | 0.294335056 |             |             |
|              | 5 | 8602.255  | 15986.083 | 0.538108991 |             |             |

|              |   | Smad4     | GAPDH     | Smad4/GAPDH | mean        | SD          |
|--------------|---|-----------|-----------|-------------|-------------|-------------|
| sham         | 1 | 7127.376  | 22739.678 | 0.313433462 | 0.421919255 | 0.091116626 |
|              | 2 | 8773.376  | 16034.841 | 0.547144559 |             |             |
|              | 3 | 7741.426  | 16588.376 | 0.466677751 |             |             |
|              | 4 | 7574.255  | 17961.255 | 0.421699653 |             |             |
|              | 5 | 5568.598  | 15440.841 | 0.360640849 |             |             |
| UUO          | 1 | 16136.669 | 15406.426 | 1.047398598 | 1.057908377 | 0.153084062 |
|              | 2 | 17463.548 | 15579.134 | 1.120957558 |             |             |
|              | 3 | 14115.719 | 15299.255 | 0.922640939 |             |             |
|              | 4 | 20671.376 | 16104.548 | 1.283573808 |             |             |
|              | 5 | 13543.255 | 14801.841 | 0.914970982 |             |             |
| UUO + PR-619 | 1 | 4505.426  | 12372.841 | 0.364138358 | 0.453714428 | 0.124035811 |
|              | 2 | 8935.548  | 15012.134 | 0.595221705 |             |             |
|              | 3 | 8128.426  | 17039.426 | 0.477036374 |             |             |
|              | 4 | 5092.305  | 17357.548 | 0.293376979 |             |             |
|              | 5 | 10562.497 | 19603.79  | 0.538798722 |             |             |

|              |   | TGF-βRI   | GAPDH     | TGF-βRI/GAPDH | mean        | SD          |
|--------------|---|-----------|-----------|---------------|-------------|-------------|
| sham         | 1 | 14221.456 | 23938.962 | 0.594071539   | 0.39706647  | 0.115397225 |
|              | 2 | 9272.841  | 23640.669 | 0.392241057   |             |             |
|              | 3 | 5672.255  | 17500.841 | 0.324113281   |             |             |
|              | 4 | 7142.719  | 19352.083 | 0.369093033   |             |             |
|              | 5 | 5223.841  | 17081.79  | 0.305813442   |             |             |
| UUO          | 1 | 16283.962 | 12247.841 | 1.329537345   | 1.084958963 | 0.281298626 |
|              | 2 | 12090.719 | 15698.426 | 0.770186705   |             |             |
|              | 3 | 12890.79  | 16000.962 | 0.805625937   |             |             |
|              | 4 | 20602.669 | 15194.719 | 1.355909839   |             |             |
|              | 5 | 18965.376 | 16299.79  | 1.16353499    |             |             |
| UUO + PR-619 | 1 | 14306.962 | 11163.134 | 1.28162593    | 1.16298192  | 0.192539801 |
|              | 2 | 12694.962 | 11172.426 | 1.136276221   |             |             |
|              | 3 | 9738.962  | 10629.426 | 0.916226521   |             |             |
|              | 4 | 16376.376 | 11577.548 | 1.41449433    |             |             |
|              | 5 | 13587.962 | 12743.255 | 1.066286596   |             |             |

|              |   | TGF- $\beta$ RII | GAPDH     | TGF- $\beta$ RII/GAPDH | mean        | SD          |
|--------------|---|------------------|-----------|------------------------|-------------|-------------|
| sham         | 1 | 17728.962        | 15524.426 | 1.142004349            | 1.040963759 | 0.144411441 |
|              | 2 | 17842.548        | 22190.79  | 0.804051951            |             |             |
|              | 3 | 20699.255        | 17830.426 | 1.160895146            |             |             |
|              | 4 | 18395.548        | 16957.669 | 1.084792255            |             |             |
|              | 5 | 17911.426        | 17680.255 | 1.013075094            |             |             |
| UUO          | 1 | 10027.962        | 12761.012 | 0.785828115            | 0.497673209 | 0.251154351 |
|              | 2 | 3939.305         | 16431.669 | 0.23973858             |             |             |
|              | 3 | 6879.719         | 16414.841 | 0.419115787            |             |             |
|              | 4 | 10965.012        | 14812.426 | 0.740257673            |             |             |
|              | 5 | 5180.305         | 17072.719 | 0.303425893            |             |             |
| UUO + PR-619 | 1 | 6313.012         | 16178.841 | 0.390201746            | 0.366482807 | 0.111218002 |
|              | 2 | 3399.477         | 12469.134 | 0.272631363            |             |             |
|              | 3 | 3738.77          | 13202.012 | 0.283196985            |             |             |
|              | 4 | 7407.012         | 13550.134 | 0.546637546            |             |             |
|              | 5 | 4919.134         | 14478.841 | 0.339746393            |             |             |

**Figure 6**

| NRK-49F                 |   | $\alpha$ -SMA | $\beta$ -actin | $\alpha$ -SMA/ $\beta$ -actin | mean        | SD          |
|-------------------------|---|---------------|----------------|-------------------------------|-------------|-------------|
| Control                 | 1 | 1104.79       | 21656.669      | 0.051013847                   | 0.035354534 | 0.012125393 |
|                         | 2 | 523.234       | 22100.255      | 0.023675473                   |             |             |
|                         | 3 | 603.134       | 20156.962      | 0.02992187                    |             |             |
|                         | 4 | 902.134       | 19844.841      | 0.045459372                   |             |             |
|                         | 5 | 542.113       | 20302.255      | 0.026702108                   |             |             |
| TGF- $\beta$ 1          | 1 | 19042.669     | 18731.255      | 1.016625368                   | 0.979323721 | 0.060979751 |
|                         | 2 | 20065.548     | 20540.376      | 0.976883189                   |             |             |
|                         | 3 | 16533.548     | 18135.841      | 0.911650472                   |             |             |
|                         | 4 | 19647.134     | 18528.426      | 1.06037793                    |             |             |
|                         | 5 | 18259.134     | 19610.669      | 0.931081647                   |             |             |
| TGF- $\beta$ 1 + PR-619 | 1 | 1170.305      | 18311.669      | 0.06391034                    | 0.082041355 | 0.024324069 |
|                         | 2 | 2153.912      | 18748.255      | 0.114885999                   |             |             |
|                         | 3 | 1108.598      | 18778.255      | 0.059036263                   |             |             |
|                         | 4 | 1822.912      | 18183.669      | 0.100249955                   |             |             |
|                         | 5 | 1321.012      | 18315.79       | 0.072124216                   |             |             |

| NRK-49F                 |   | Smad4     | $\beta$ -actin | Smad4/ $\beta$ -actin | mean        | SD          |
|-------------------------|---|-----------|----------------|-----------------------|-------------|-------------|
| Control                 | 1 | 20810.497 | 20357.548      | 1.022249684           | 1.091290429 | 0.07131111  |
|                         | 2 | 20381.669 | 18675.548      | 1.091355873           |             |             |
|                         | 3 | 20059.255 | 19494.962      | 1.028945581           |             |             |
|                         | 4 | 20259.669 | 18124.548      | 1.117802717           |             |             |
|                         | 5 | 19728.255 | 16493.841      | 1.196098289           |             |             |
| TGF- $\beta$ 1          | 1 | 17505.841 | 15690.962      | 1.115663973           | 1.071486524 | 0.043605332 |
|                         | 2 | 17843.669 | 16369.841      | 1.090033129           |             |             |
|                         | 3 | 18767.548 | 17034.669      | 1.101726602           |             |             |
|                         | 4 | 17241.719 | 16921.841      | 1.018903262           |             |             |
|                         | 5 | 18912.376 | 18341.841      | 1.031105656           |             |             |
| TGF- $\beta$ 1 + PR-619 | 1 | 8320.841  | 12090.719      | 0.688200677           | 0.52535126  | 0.121546968 |
|                         | 2 | 8793.255  | 14815.426      | 0.593520227           |             |             |
|                         | 3 | 7546.134  | 15328.255      | 0.492302222           |             |             |
|                         | 4 | 7821.255  | 16075.548      | 0.486531159           |             |             |
|                         | 5 | 6039.497  | 16492.255      | 0.366202014           |             |             |
